# Supplementary material for: Chirality transfer through sulfur or selenium to chiral propellers
Source: Royal Society of Chemistry journal article supplement (doi:10.1039/c5ra14072b), 2015-01-01
Supplement: c5ra14072b1.pdf [file c5ra14072b1.pdf]

## Chirality transfer through sulfur or selenium to chiral propellers

Pawel Skowronek,<sup>\*a</sup> Jacek Ścianowski,<sup>b</sup> Agata J. Pacula<sup>b</sup> and Jacek Gawroński<sup>a</sup>

*a* Department of Chemistry, A. Mickiewicz University, Poznań, Poland

E-mail: Pawel.Skowronek@amu.edu.pl

*b* Department of Organic Chemistry, Nicolaus Copernicus University, 7 Gagarin Street, 87-100 Torun, Poland, E-mail: jsch@chem.umk.pl

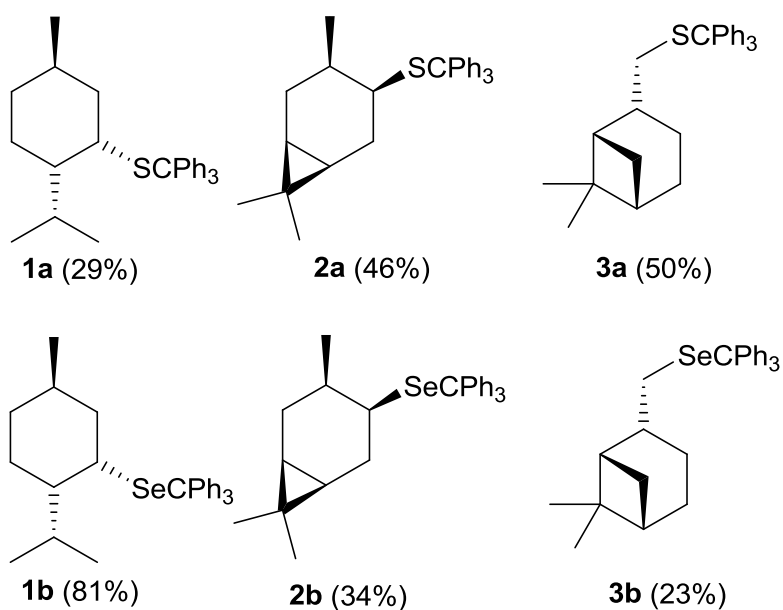

Figure 1. trityl sulfides **1a**, **2a**, **3a** and trityl selenides **1b**, **2b**, **3b**

### EXPERIMENTAL

Melting points were measured with a Büchi Tottoli SPM-20 heating unit and are uncorrected. NMR spectra were recorded on Bruker Avance III/400 or Bruker Avance III/700. Chemical shifts are expressed in parts per million (ppm) relative to TMS. Optical rotations were measured in 10-mm cells with a polAAR 3000 polarimeter. TLC was conducted on precoated silica gel plates (Merck 60F254) and the spots were visualized under UV light. Column chromatography was carried out on column using Silica Gel 60 Merck (70–230 mesh). All reactions requiring anhydrous conditions were conducted in flame-dried apparatus.

## 1. General procedure for the synthesis of sulfur trityl derivatives

Trityl chloride (0.85g, 3.0mmol) was slowly added to the solution of thiol (3.0mmol) and pyridine (0.26g, 3.3mmol) in dry DCM (6ml). The mixture was stirred at room temperature for 24h, poured into water (100ml), and extracted with DCM (2 x 50ml). The combined organic layers were washed with water (2 x 50ml), dried over magnesium sulphate, and evaporated. The crude product was purified by column chromatography (silica gel, hexane/ethyl acetate 98/2).

### 1.1. (+)-Neomenthyl trityl sulfide (1a)

Yield = 29%, oil;  $[\alpha]_{\text{D}}^{20} = +99.83$  (c 3.0,  $\text{CHCl}_3$ );  $^1\text{H NMR}$  (700 MHz,  $\text{CDCl}_3$ )  $\sigma = 0.36$  (d,  $J=6.3$  Hz, 3H,  $\text{CH}_3$ ), 0.70-0.74 (m, 1H), 0.75 (d,  $J=7.0$  Hz, 3H,  $\text{CH}_3$ ), 0.81 (d,  $J=7.0$  Hz, 3H,  $\text{CH}_3$ ), 0.82-0.92 (m, 2H), 1.23-1.28 (m, 1H), 1.28-1.37 (m, 1H), 1.67-1.75 (m, 2H), 1.77-1.82 (m, 1H), 2.19-2.28 (m, 1H), 2.57 (d,  $J=2.8$  Hz, 1H), 7.19-7.22 (m, 3H, arom.), 7.28 (t,  $J=7.7$  Hz, 6H, arom.), 7.59-7.63 (m, 6H, arom.) ppm;  $^{13}\text{C NMR}$  (100 MHz,  $\text{CDCl}_3$ )  $\sigma = 20.39$  ( $\text{CH}_3$ ), 21.00 ( $\text{CH}_3$ ), 21.62 ( $\text{CH}_3$ ), 26.79 ( $\text{CH}_2$ ), 26.88 (CH), 28.97 (CH), 35.36 ( $\text{CH}_2$ ), 39.88 ( $\text{CH}_2$ ), 45.64 (CH), 50.13 (CH), 66.50 (C), 126.17 (3 x CH), 127.43 (6 x CH), 129.51 (6 x CH), 145.42 (3 x C) ppm.

### 1.2. (-)-Caranyl trityl sulfide (2a)

Yield = 46%, oil;  $[\alpha]_{\text{D}}^{20} = -49.13$  (c 2.5,  $\text{CHCl}_3$ );  $^1\text{H NMR}$  (700 MHz,  $\text{CDCl}_3$ )  $\sigma = 0.25$ -0.32 (m, 2H), 0.79-0.82 (m, 2H), 0.89 (s, 3H,  $\text{CH}_3$ ), 0.91 (s, 3H,  $\text{CH}_3$ ), 0.98 (d,  $J=7.0$  Hz, 3H,  $\text{CH}_3$ ), 1.02-1.05 (m, 1H), 1.82-1.89 (m, 1H), 1.92-1.98 (m, 1H), 2.40-2.44 (m, 1H), 7.22-7.25 (m, 3H, arom.), 7.29-7.33 (m, 6H, arom.), 7.57-7.59 (m, 6H, arom.) ppm;  $^{13}\text{C NMR}$  (176 MHz,  $\text{CDCl}_3$ )  $\sigma = 15.52$  ( $\text{CH}_3$ ), 17.45 (C), 18.19 (CH), 18.81 ( $\text{CH}_3$ ), 24.06 ( $\text{CH}_2$ ), 24.67 (CH), 26.87( $\text{CH}_2$ ), 28.39 ( $\text{CH}_3$ ), 29.16 (CH), 45.19 (CH), 67.27 (C), 126.44 (3 x CH), 127.78 (6 x CH), 129.77 (6 x CH), 145.52 (3 x C) ppm.

### 1.3. (-)-Myrtanyl trityl sulfide (3a)

Yield = 50%, oil;  $[\alpha]_{\text{D}}^{20} = -40.25$  (c 2.8,  $\text{CHCl}_3$ );  $^1\text{H NMR}$  (700 MHz,  $\text{CDCl}_3$ )  $\sigma = 0.75$  (s, 3H,  $\text{CH}_3$ ), 0.82 (d,  $J=9.8$  Hz, 1H), 0.87-0.92 (m, 1H), 1.14 (s, 3H,  $\text{CH}_3$ ), 1.30-1.38 (m, 1H), 1.78-1.81 (m, 1H), 1.82-1.90 (m, 2H,  $\text{CH}_2$ ), 1.96-1.98 (m, 1H), 2.04-2.10 (m, 1H), 2.18 (dd,  $J=7.7$  Hz,  $J=11.2$  Hz, 1H), 2.29 (dd,  $J=7.7$  Hz,  $J=11.2$  Hz, 1H) 2.29-2.32 (m, 1H), 7.22-7.24 (m, 3H, arom.), 7.29-7.33 (m, 6H, arom.), 7.44-7.46 (m, 6H, arom.) ppm;  $^{13}\text{C NMR}$  (176 MHz,  $\text{CDCl}_3$ )  $\sigma = 22.21$  ( $\text{CH}_2$ ), 22.78 ( $\text{CH}_3$ ), 26.19 ( $\text{CH}_2$ ), 27.94 ( $\text{CH}_3$ ), 33.36 ( $\text{CH}_2$ ), 38.94 ( $\text{CH}_2$ ), 40.33 (CH), 41.23 (CH), 45.51 (CH), 66.30 (C), 126.48 (3 x CH), 127.78 (6 x CH), 129.65 (6 x CH), 145.12 (C) ppm.

## 2. General procedure for the synthesis of selenyl trityl derivatives

Selenol (2.3 mmol) in dry DCM (10ml) was carefully added to the suspension of sodium hydride (0.06g, 2.5mmol) in dry DCM (5ml) under argon atmosphere. After stirring for 10 min the mixture was cooled to 0 °C and trityl chloride (0.64g, 2.3mmol) in dry DCM (10ml) was added. The mixture was stirred at room temperature for 1h, poured into water (100ml) and extracted with DCM (3 x 50ml). The combined organic layers were dried over magnesium sulphate, and evaporated. The crude product was purified by column chromatography (silica gel, hexane/ethyl acetate 99/1).

### 2.1. (+)-Neomenthyl trityl selenide (1b)

Yield 81%, mp = 137-139 °C (from methanol);  $[\alpha]_D^{20} = -199.00$  (c 3.01, CHCl<sub>3</sub>); <sup>1</sup>H NMR (700 MHz, CDCl<sub>3</sub>)  $\sigma = 0.54$  (d,  $J=6.3$  Hz, 3H, CH<sub>3</sub>), 0.79-1.02 (m, 9H), 1.16-1.21 (m, 1H), 1.36 (d,  $J=13.3$  Hz, 1H), 1.64-1.69 (m, 1H), 1.79 (t,  $J=14.7$  Hz, 2H, CH<sub>2</sub>), 2.25-2.33 (m, 1H), 2.59 (s, 1H), 7.19 (t,  $J=7.0$  Hz, 3H, arom.), 7.25-7.29 (m, 6H, arom.), 7.57 (d,  $J=7.7$  Hz, 6H, arom.) ppm; <sup>13</sup>C NMR (100 MHz, CDCl<sub>3</sub>)  $\sigma = 20.63$  (CH<sub>3</sub>), 21.09 (CH<sub>3</sub>), 21.69 (CH<sub>3</sub>), 27.88 (CH), 28.20 (CH<sub>2</sub>), 30.34 (CH), 35.28 (CH<sub>2</sub>), 40.41 (CH<sub>2</sub>), 47.62 (CH), 50.57 (CH), 64.50 (C), 126.15 (3 x CH), 127.56 (6 x CH), 129.89 (6 x CH), 145.76 (3 x C) ppm; <sup>77</sup>Se NMR (76 MHz, CDCl<sub>3</sub>)  $\sigma = 474.04$  ppm.

### 2.2. (-)-Caranyl trityl selenide (2b)

Yield = 34%, oil;  $[\alpha]_D^{20} = -24.95$  (c 3.00, CHCl<sub>3</sub>); <sup>1</sup>H NMR (400 MHz, CDCl<sub>3</sub>)  $\sigma = 0.27$ -0.32 (m, 2H), 0.77-0.88 (m, 1H), 0.90 (s, 3H, CH<sub>3</sub>), 0.93 (s, 3H, CH<sub>3</sub>), 0.97 (d,  $J=6.8$  Hz, 2H), 1.00-1.09 (m, 2H), 1.35-1.43 (m, 1H), 1.92-1.97 (m, 2H), 2.49-2.51 (m, 1H), 7.19-7.24 (m, 3H, arom.), 7.28-7.35 (m, 6H, arom.), 7.51-7.53 (m, 6H, arom.) ppm; <sup>13</sup>C NMR (100 MHz, CDCl<sub>3</sub>)  $\sigma = 15.51$  (CH<sub>3</sub>), 17.31 (C), 18.37 (CH), 20.29 (CH<sub>3</sub>), 24.67 (CH), 24.69 (CH<sub>2</sub>), 26.69 (CH<sub>2</sub>), 28.29 (CH<sub>3</sub>), 29.49 (CH), 45.26 (CH), 64.76 (C), 126.28 (3 x CH), 127.67 (6 x CH), 130.09 (6 x CH), 145.83 (3 x C) ppm; <sup>77</sup>Se NMR (76 MHz, CDCl<sub>3</sub>)  $\sigma = 551.30$  ppm.

### 2.3. (-)-Myrtanyl trityl selenide (3b)

Yield = 23%, oil;  $[\alpha]_D^{20} = -28.60$  (c 0.93, CHCl<sub>3</sub>); <sup>1</sup>H NMR (700 MHz, CDCl<sub>3</sub>)  $\sigma = 0.80$  (d,  $J=9.6$  Hz, 1H), 0.81 (s, CH<sub>3</sub>, 3H), 1.14 (s, 3H, CH<sub>3</sub>), 1.32-1.35 (m, 1H), 1.75-1.89 (m, 5H), 2.08-2.11 (m, 1H), 2.25-2.31 (m, 1H), 2.34 (dd,  $J=8.0$  Hz,  $J=10.8$  Hz, 1H), 2.45-2.50 (dd,  $J=7.6$  Hz,  $J=10.8$  Hz, 1H), 7.19-7.24 (m, 3H, arom.), 7.27-7.30 (m, 6H, arom.), 7.35-7.36 (m, 6H, arom.) ppm; <sup>13</sup>C NMR (100 MHz, CDCl<sub>3</sub>)  $\sigma = 22.76$  (CH<sub>2</sub>), 22.80 (CH<sub>3</sub>), 26.08 (CH<sub>2</sub>), 27.87 (CH<sub>3</sub>), 33.33 (CH<sub>2</sub>), 35.76 (CH<sub>2</sub>), 40.84 (CH), 41.13 (CH), 46.32 (CH), 64.03 (C), 126.37 (3 x CH), 127.69 (6 x CH), 129.97 (6 x CH), 145.79 (3 x C) ppm; <sup>77</sup>Se NMR (76 MHz, CDCl<sub>3</sub>)  $\sigma = 492.63$  ppm.

Table X1. NATURAL POPULATIONS: Natural atomic orbital occupancies on sulfur atom

| NAO | Atom | No | lang  | Type(AO) | Occupancy | Energy    |
|-----|------|----|-------|----------|-----------|-----------|
| 295 | S    | 30 | S     | Cor( 1s) | 2.00000   | -87.68626 |
| 296 | S    | 30 | S     | Cor( 2s) | 1.99946   | -8.79986  |
| 297 | S    | 30 | S     | Val( 3s) | 1.68161   | -0.70676  |
| 298 | S    | 30 | S     | Ryd( 4s) | 0.00461   | 1.00685   |
| 299 | S    | 30 | S     | Ryd( 5s) | 0.00001   | 14.06031  |
| 300 | S    | 30 | S     | Ryd( 6s) | 0.00000   | 182.68265 |
| 301 | S    | 30 | px    | Cor( 2p) | 1.99988   | -5.87156  |
| 302 | S    | 30 | px    | Val( 3p) | 0.89619   | -0.13957  |
| 303 | S    | 30 | px    | Ryd( 4p) | 0.00465   | 0.83838   |
| 304 | S    | 30 | px    | Ryd( 5p) | 0.00015   | 2.56111   |
| 305 | S    | 30 | px    | Ryd( 6p) | 0.00000   | 16.74413  |
| 306 | S    | 30 | py    | Cor( 2p) | 1.99997   | -5.86387  |
| 307 | S    | 30 | py    | Val( 3p) | 1.89676   | -0.22085  |
| 308 | S    | 30 | py    | Ryd( 4p) | 0.00461   | 0.64485   |
| 309 | S    | 30 | py    | Ryd( 5p) | 0.00011   | 2.32687   |
| 310 | S    | 30 | py    | Ryd( 6p) | 0.00000   | 16.82928  |
| 311 | S    | 30 | pz    | Cor( 2p) | 1.99991   | -5.86902  |
| 312 | S    | 30 | pz    | Val( 3p) | 1.32865   | -0.18850  |
| 313 | S    | 30 | pz    | Ryd( 4p) | 0.00191   | 0.39130   |
| 314 | S    | 30 | pz    | Ryd( 5p) | 0.00014   | 2.49061   |
| 315 | S    | 30 | pz    | Ryd( 6p) | 0.00000   | 16.73898  |
| 316 | S    | 30 | dxy   | Ryd( 3d) | 0.00118   | 1.12932   |
| 317 | S    | 30 | dxz   | Ryd( 3d) | 0.00625   | 1.33749   |
| 318 | S    | 30 | dyz   | Ryd( 3d) | 0.00130   | 1.04503   |
| 319 | S    | 30 | dx2y2 | Ryd( 3d) | 0.00290   | 1.22194   |
| 320 | S    | 30 | dz2   | Ryd( 3d) | 0.00175   | 1.09093   |

Natural Electron Configuration of sulfur atom: [core]3S( 1.68)3p( 4.12)3d( 0.01)4p( 0.01)

Table X2. Occupancy of natural orbitals (NBOs) located on sulfur atom (except core NBOs)

| (Occupancy)    | Bond orbital/                                        | Coefficients/ | Hybrids |
|----------------|------------------------------------------------------|---------------|---------|
| 13. (1.97232)  | BD ( 1) C 10 - S 30                                  |               |         |
| ( 51.28%)      | 0.7161* C 10 s( 18.71%)p 4.34( 81.16%)d 0.01( 0.14%) |               |         |
|                | 0.0002 0.4322 -0.0176 -0.0007 0.6794                 |               |         |
|                | -0.0078 -0.0071 -0.0706 -0.0053 0.0019               |               |         |
|                | -0.5872 0.0054 0.0057 -0.0050 -0.0312                |               |         |
|                | 0.0047 0.0176 0.0050                                 |               |         |
| ( 48.72%)      | 0.6980* S 30 s( 16.90%)p 4.89( 82.63%)d 0.03( 0.47%) |               |         |
|                | 0.0000 0.0003 0.4095 0.0365 0.0006                   |               |         |
|                | 0.0000 -0.0001 -0.6328 0.0436 0.0048                 |               |         |
|                | 0.0005 0.0000 0.1185 0.0011 -0.0015                  |               |         |
|                | -0.0001 0.0002 0.6401 -0.0131 0.0049                 |               |         |
|                | 0.0000 -0.0110 -0.0582 0.0127 0.0247                 |               |         |
|                | 0.0213                                               |               |         |
| 31. (1.94403)  | BD ( 1) S 30 - C 31                                  |               |         |
| ( 46.76%)      | 0.6838* S 30 s( 14.79%)p 5.73( 84.78%)d 0.03( 0.43%) |               |         |
|                | 0.0000 0.0005 0.3829 0.0353 -0.0009                  |               |         |
|                | 0.0000 0.0003 0.7663 -0.0405 -0.0054                 |               |         |
|                | -0.0005 0.0000 0.0706 0.0010 -0.0002                 |               |         |
|                | -0.0002 0.0002 0.5039 -0.0001 0.0048                 |               |         |
|                | -0.0007 0.0086 0.0545 0.0048 0.0349                  |               |         |
|                | -0.0006                                              |               |         |
| ( 53.24%)      | 0.7297* C 31 s( 15.88%)p 5.29( 84.02%)d 0.01( 0.10%) |               |         |
|                | 0.0000 0.3972 -0.0322 -0.0003 -0.8308                |               |         |
|                | 0.0300 0.0044 -0.0275 0.0003 -0.0003                 |               |         |
|                | -0.3850 0.0067 0.0027 0.0032 0.0217                  |               |         |
|                | 0.0016 0.0212 -0.0059                                |               |         |
| 111. (1.97559) | LP ( 1) S 30                                         |               |         |
|                | s( 68.54%)p 0.46( 31.45%)d 0.00( 0.01%)              |               |         |
|                | 0.0000 -0.0003 0.8277 -0.0162 0.0000                 |               |         |
|                | 0.0000 -0.0001 -0.0414 -0.0020 0.0000                |               |         |
|                | -0.0001 0.0000 -0.0910 -0.0011 0.0018                |               |         |
|                | 0.0000 -0.0001 -0.5518 0.0015 -0.0015                |               |         |
|                | 0.0003 0.0002 0.0012 -0.0037 -0.0074                 |               |         |
|                | -0.0071                                              |               |         |
| 112. (1.91543) | LP ( 2) S 30                                         |               |         |
|                | s( 0.00%)p 1.00( 99.98%)d 0.00( 0.02%)               |               |         |
|                | 0.0000 -0.0001 0.0005 0.0027 -0.0005                 |               |         |
|                | 0.0000 0.0001 -0.0178 -0.0005 0.0004                 |               |         |
|                | -0.0003 0.0000 -0.9856 -0.0298 0.0002                |               |         |
|                | -0.0006 0.0000 0.1647 0.0070 0.0021                  |               |         |
|                | -0.0002 -0.0011 0.0007 -0.0122 0.0004                |               |         |
|                | 0.0038                                               |               |         |

Table X3. Second Order Perturbation Theory Analysis of Fock Matrix in NBO Basis – selected data for interactions of NBOs located on sulfur atom

Threshold for printing: 0.50 kcal/mol

| Donor NBO (i)                  |                                  | Acceptor NBO (j) |             | E(2)<br>kcal/mol | E(j)-E(i)<br>a.u. | F(i,j)<br>a.u. |
|--------------------------------|----------------------------------|------------------|-------------|------------------|-------------------|----------------|
| <b>9. BD ( 1) C 7 - H 9</b>    | <b>/689. BD*( 1) C 10 - S 30</b> | <b>6.33</b>      | <b>0.63</b> | <b>0.057</b>     |                   |                |
| 12. BD ( 1) C 10 - C 12        | /338. RY*( 1) S 30               | 0.56             | 1.39        | 0.025            |                   |                |
| 12. BD ( 1) C 10 - C 12        | /707. BD*( 1) S 30 - C 31        | 0.97             | 0.70        | 0.023            |                   |                |
| 34. BD ( 1) C 31 - C 34        | /689. BD*( 1) C 10 - S 30        | 0.80             | 0.77        | 0.022            |                   |                |
| 35. BD ( 1) C 32 - C 35        | /707. BD*( 1) S 30 - C 31        | 0.70             | 0.80        | 0.021            |                   |                |
| <b>36. BD ( 2) C 32 - C 35</b> | <b>/707. BD*( 1) S 30 - C 31</b> | <b>5.07</b>      | <b>0.36</b> | <b>0.041</b>     |                   |                |
| <b>38. BD ( 1) C 33 - C 45</b> | <b>/707. BD*( 1) S 30 - C 31</b> | <b>2.03</b>      | <b>0.80</b> | <b>0.036</b>     |                   |                |
| <b>39. BD ( 2) C 33 - C 45</b> | <b>/707. BD*( 1) S 30 - C 31</b> | <b>2.21</b>      | <b>0.36</b> | <b>0.027</b>     |                   |                |
| <b>43. BD ( 2) C 34 - C 44</b> | <b>/707. BD*( 1) S 30 - C 31</b> | <b>2.13</b>      | <b>0.36</b> | <b>0.027</b>     |                   |                |
| 92. CR ( 1) C 31               | /707. BD*( 1) S 30 - C 31        | 0.76             | 10.22       | 0.080            |                   |                |
| 712. BD*( 2) C 32 - C 35       | /707. BD*( 1) S 30 - C 31        | 7.18             | 0.08        | 0.046            |                   |                |
| 715. BD*( 2) C 33 - C 45       | /707. BD*( 1) S 30 - C 31        | 2.19             | 0.08        | 0.026            |                   |                |
| 719. BD*( 2) C 34 - C 44       | /707. BD*( 1) S 30 - C 31        | 1.78             | 0.07        | 0.023            |                   |                |
| 13. BD ( 1) C 10 - S 30        | /159. RY*( 1) C 7                | 0.58             | 1.49        | 0.026            |                   |                |
| 13. BD ( 1) C 10 - S 30        | /161. RY*( 3) C 7                | 0.71             | 1.49        | 0.029            |                   |                |
| 13. BD ( 1) C 10 - S 30        | /200. RY*( 1) C 12               | 0.69             | 1.44        | 0.028            |                   |                |
| 13. BD ( 1) C 10 - S 30        | /202. RY*( 3) C 12               | 0.54             | 1.43        | 0.025            |                   |                |
| 13. BD ( 1) C 10 - S 30        | /357. RY*( 3) C 31               | 0.59             | 1.39        | 0.026            |                   |                |
| <b>13. BD ( 1) C 10 - S 30</b> | <b>/685. BD*( 1) C 7 - H 9</b>   | <b>2.17</b>      | <b>0.98</b> | <b>0.041</b>     |                   |                |
| <b>13. BD ( 1) C 10 - S 30</b> | <b>/690. BD*( 1) C 12 - H 13</b> | <b>2.32</b>      | <b>0.99</b> | <b>0.043</b>     |                   |                |
| 13. BD ( 1) C 10 - S 30        | /710. BD*( 1) C 31 - C 34        | 0.78             | 0.95        | 0.024            |                   |                |
| <b>31. BD ( 1) S 30 - C 31</b> | <b>/370. RY*( 3) C 32</b>        | <b>1.17</b>      | <b>1.27</b> | <b>0.035</b>     |                   |                |
| 31. BD ( 1) S 30 - C 31        | /382. RY*( 2) C 33               | 0.54             | 1.73        | 0.028            |                   |                |
| 31. BD ( 1) S 30 - C 31        | /383. RY*( 3) C 33               | 0.59             | 1.32        | 0.025            |                   |                |
| <b>31. BD ( 1) S 30 - C 31</b> | <b>/395. RY*( 2) C 34</b>        | <b>1.27</b>      | <b>1.64</b> | <b>0.041</b>     |                   |                |
| <b>31. BD ( 1) S 30 - C 31</b> | <b>/688. BD*( 1) C 10 - C 12</b> | <b>1.15</b>      | <b>0.91</b> | <b>0.029</b>     |                   |                |
| 31. BD ( 1) S 30 - C 31        | /711. BD*( 1) C 32 - C 35        | 0.83             | 1.11        | 0.027            |                   |                |
| <b>31. BD ( 1) S 30 - C 31</b> | <b>/712. BD*( 2) C 32 - C 35</b> | <b>4.04</b>      | <b>0.57</b> | <b>0.046</b>     |                   |                |
| <b>31. BD ( 1) S 30 - C 31</b> | <b>/714. BD*( 1) C 33 - C 45</b> | <b>2.79</b>      | <b>1.11</b> | <b>0.050</b>     |                   |                |
| <b>31. BD ( 1) S 30 - C 31</b> | <b>/715. BD*( 2) C 33 - C 45</b> | <b>1.19</b>      | <b>0.57</b> | <b>0.025</b>     |                   |                |
| <b>31. BD ( 1) S 30 - C 31</b> | <b>/718. BD*( 1) C 34 - C 44</b> | <b>3.10</b>      | <b>1.11</b> | <b>0.053</b>     |                   |                |
| <b>31. BD ( 1) S 30 - C 31</b> | <b>/719. BD*( 2) C 34 - C 44</b> | <b>1.55</b>      | <b>0.57</b> | <b>0.029</b>     |                   |                |
| 88. CR ( 2) S 30               | /183. RY*( 2) C 10               | 0.83             | 9.75        | 0.080            |                   |                |
| 88. CR ( 2) S 30               | /355. RY*( 1) C 31               | 0.93             | 9.78        | 0.085            |                   |                |
| <b>111. LP ( 1) S 30</b>       | <b>/355. RY*( 1) C 31</b>        | <b>1.52</b>      | <b>1.60</b> | <b>0.044</b>     |                   |                |
| 111. LP ( 1) S 30              | /686. BD*( 1) C 7 - C 10         | 0.90             | 1.01        | 0.027            |                   |                |
| 111. LP ( 1) S 30              | /687. BD*( 1) C 10 - H 11        | 0.67             | 1.08        | 0.024            |                   |                |
| <b>111. LP ( 1) S 30</b>       | <b>/708. BD*( 1) C 31 - C 32</b> | <b>1.23</b>      | <b>1.01</b> | <b>0.032</b>     |                   |                |
| 111. LP ( 1) S 30              | /709. BD*( 1) C 31 - C 33        | 0.81             | 1.00        | 0.026            |                   |                |
| 112. LP ( 2) S 30              | /685. BD*( 1) C 7 - H 9          | 0.75             | 0.63        | 0.020            |                   |                |
| <b>112. LP ( 2) S 30</b>       | <b>/686. BD*( 1) C 7 - C 10</b>  | <b>4.69</b>      | <b>0.61</b> | <b>0.049</b>     |                   |                |
| <b>112. LP ( 2) S 30</b>       | <b>/687. BD*( 1) C 10 - H 11</b> | <b>2.31</b>      | <b>0.69</b> | <b>0.036</b>     |                   |                |
| 112. LP ( 2) S 30              | /688. BD*( 1) C 10 - C 12        | 0.55             | 0.60        | 0.016            |                   |                |
| <b>112. LP ( 2) S 30</b>       | <b>/708. BD*( 1) C 31 - C 32</b> | <b>2.16</b>      | <b>0.62</b> | <b>0.033</b>     |                   |                |
| <b>112. LP ( 2) S 30</b>       | <b>/709. BD*( 1) C 31 - C 33</b> | <b>3.86</b>      | <b>0.61</b> | <b>0.044</b>     |                   |                |
| 112. LP ( 2) S 30              | /712. BD*( 2) C 32 - C 35        | 0.75             | 0.26        | 0.013            |                   |                |
| 112. LP ( 2) S 30              | /733. BD*( 1) C 40 - H 55        | 0.62             | 0.69        | 0.019            |                   |                |
| 112. LP ( 2) S 30              | /752. BD*( 1) C 49 - H 64        | 0.53             | 0.69        | 0.017            |                   |                |

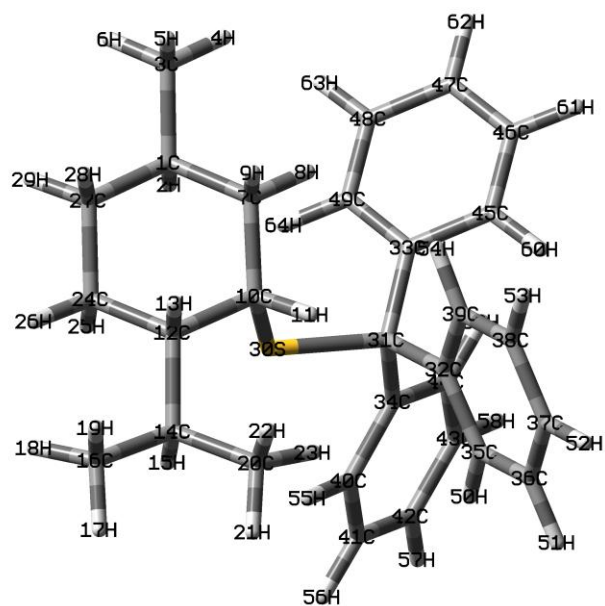

Figure X1. Atom numbering in the structure of conf 1 of **1**.

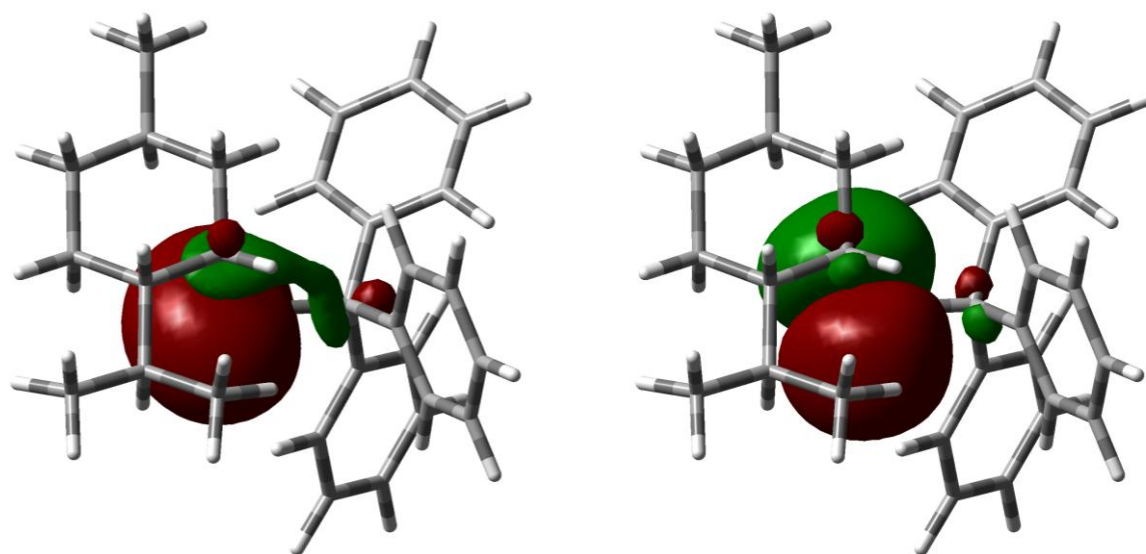

a/  
b/  
Figure X2. Lone pairs orbitals a/ lower in energy *s*-type, b/ highest occupied NBO of *p*-type

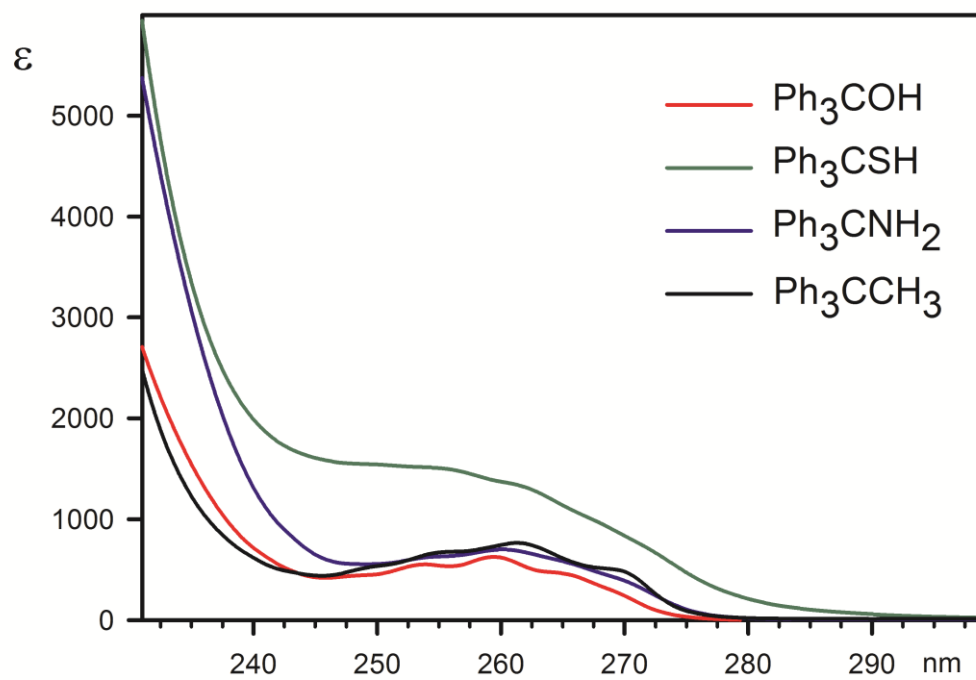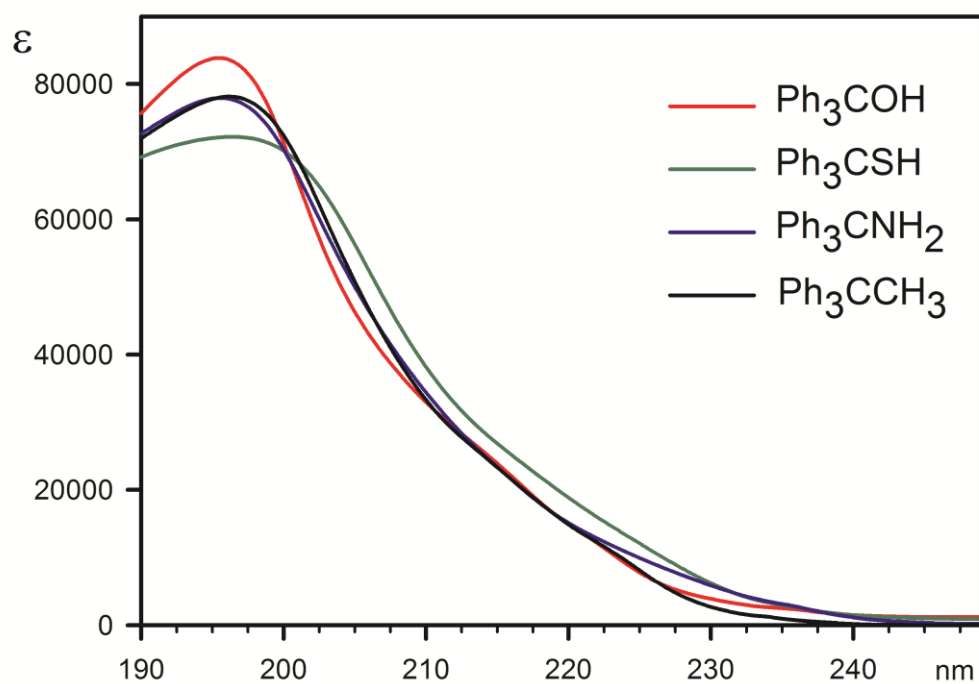

Figure X3. UV spectra of trityl derivatives in acetonitrile

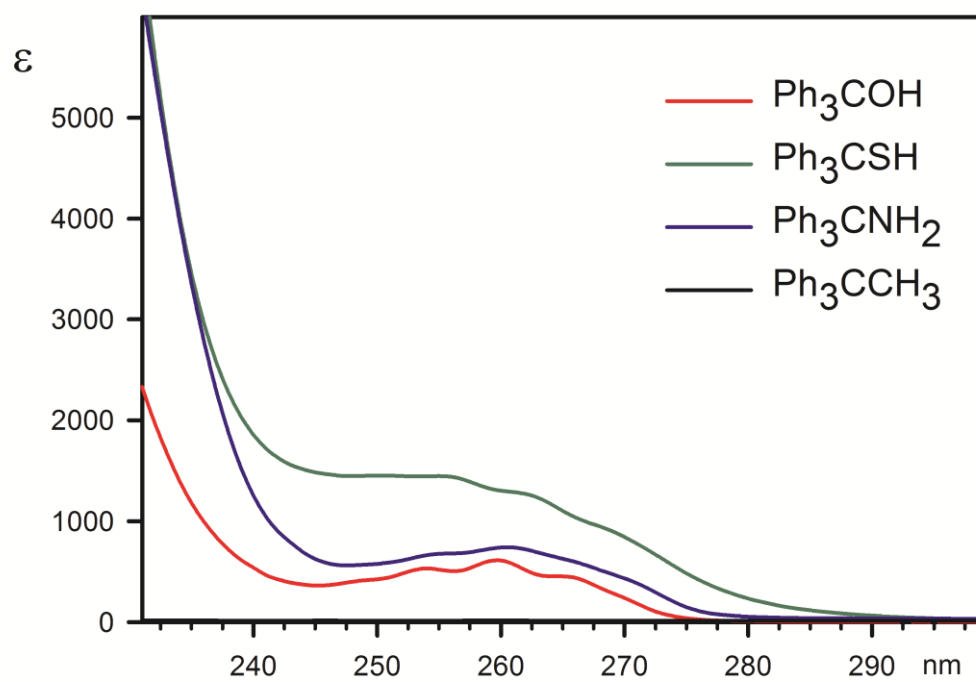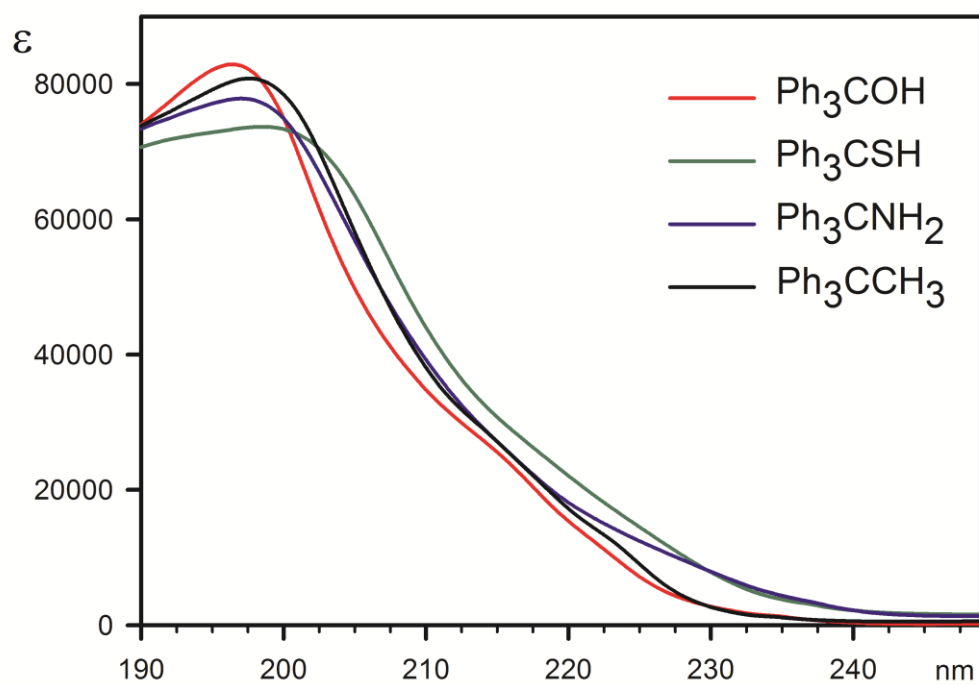

Figure X4. UV spectra of trityl derivatives in cyclohexane
